# Supplementary material
Source: PubMed Central journal article supplement (PMC4409325)
Supplement: NIHMS678144-supplement-Supplemental.pdf [file NIHMS678144-supplement-Supplemental.pdf]

## Supplementary Online Content

Bauer DC, Schwartz A, Palermo L, et al. Fracture prediction after discontinuation of 4 to 5 years of alendronate therapy: the FLEX study. *JAMA Intern Med*. Published online May 5, 2014. doi:10.1001/jamainternmed.2014.1232

**eFigure 1.** Change in Hip BMD Among Women Discontinuing Alendronate (FLEX Placebo Group)

**eFigure 2.** Change in Bone Turnover Markers Among Women Discontinuing Alendronate (FLEX Placebo Group)

This supplementary material has been provided by the authors to give readers additional information about their work.

**eFigure 1. Change in Hip BMD Among Women Discontinuing Alendronate (FLEX Placebo Group)**

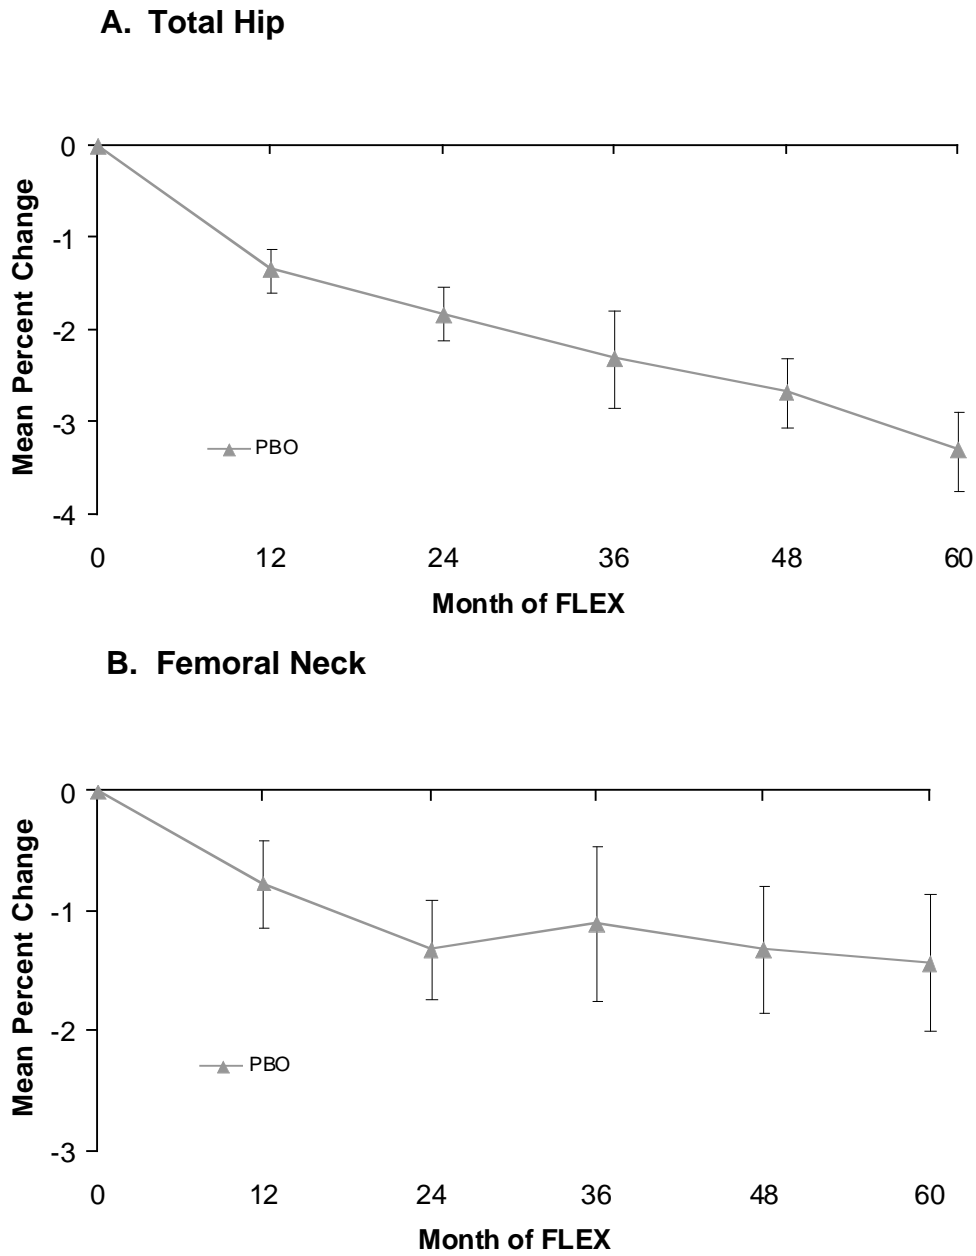

PBO indicates placebo group.

**eFigure 2. Change in Bone Turnover Markers Among Women Discontinuing Alendronate (FLEX Placebo Group)**

a. Bone Specific Alkaline Phosphatase (BSAP)

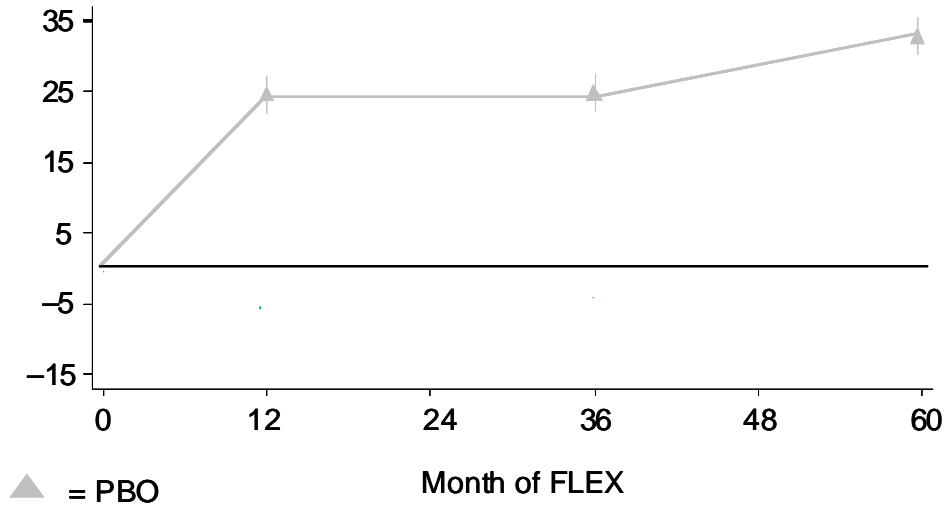

b. Urinary NTX: Creatinine Ratio

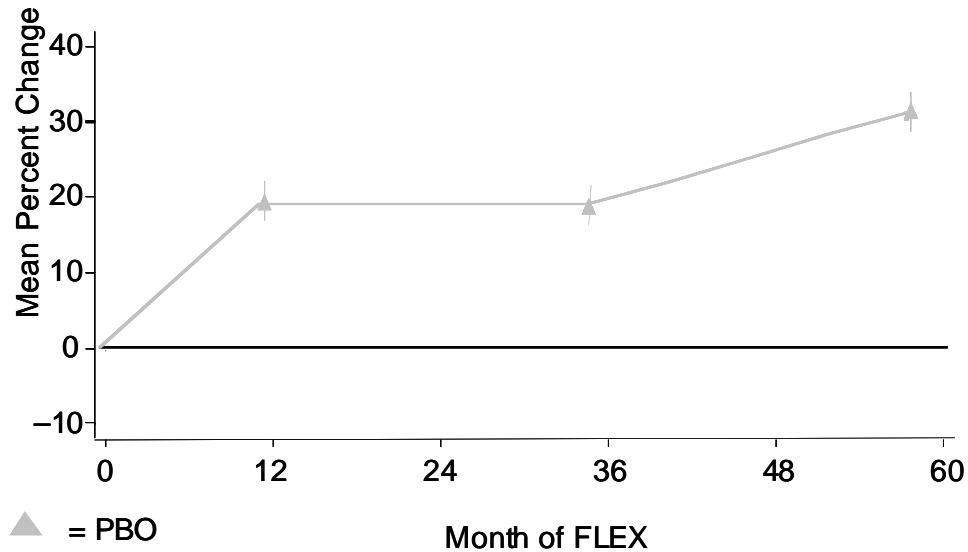

PBO indicates placebo group.
